# The American Journal of PSYCHIATRY

Latest  
IMPACT  
FACTOR  
12.759!

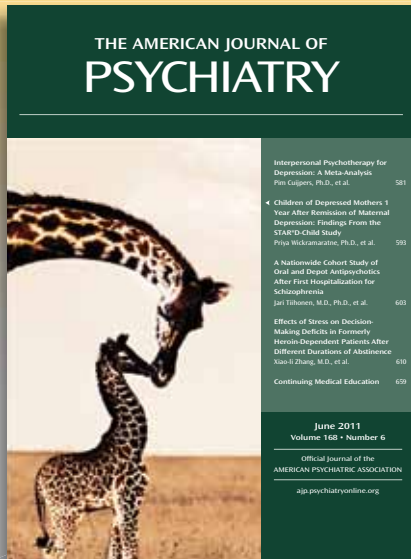

## Official Journal of the American Psychiatric Association

Edited by Robert Freedman, M.D.

- The *American Journal of Psychiatry* has an impact factor of 12.759, a rise from last year's 12.522 and 2-point rise from the previous year's 10.545, according to the recently released 2010 Journal Citation Reports® (Thomson Reuters, 2011), placing it 2nd among the 126 journals in psychiatry journals indexed, while still remaining the far-and-away leader in total citations.

- *The American Journal of Psychiatry* (AJP) is also the #2 journal in psychiatry in terms of immediacy according to Thomson Scientific's Immediacy Index. This important performance metric

is calculated by dividing the number of citations to articles published in a given year by the number of articles published in that year.

- The Immediacy Index is a good measure of how quickly a given journal's articles are cited—AJP's #2 placement is a result of publishing articles that are relevant, covering current "hot" topics and cutting-edge research, and getting these findings to the field faster with AJP in Advance, the Journal's online-ahead-of-print publication protocol.

- A recent poll conducted by the BioMedical & Life Sciences Division of The Special Libraries Association identified the 100 most influential journals in all of Biology & Medicine over the last 100 years. *The American Journal of Psychiatry* was among those honored, the only psychiatry/psychology journal represented.

No other psychiatric journal reaches more psychiatrists with greater impact or immediacy than the journal that the overwhelming majority of psychiatrists considers essential: AJP.

ISSN 0002-953X      [ajp.psychiatryonline.org](http://ajp.psychiatryonline.org)

To order a subscription, visit [www.appi.org](http://www.appi.org).

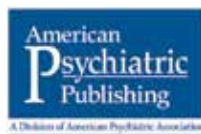

The First and Last Word in Psychiatry

[www.appi.org](http://www.appi.org) • 1-800-368-5777 • 703-907-7322

Find us on [facebook](https://www.facebook.com/ajp) and [twitter](https://twitter.com/ajp)      Priority Code AH1132

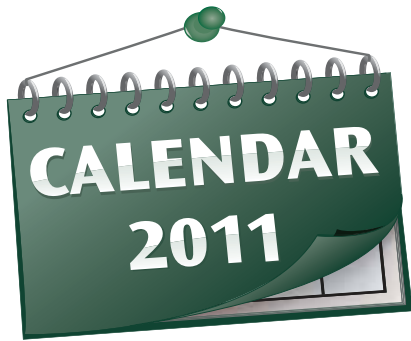

For free listing of your organization's official annual or regional meeting, please send us the following information: sponsor, location, inclusive dates, type and number of continuing education credits (if available), and the name, address, and telephone number of the person or group to contact for more information. In order for an event to appear in our listing, all notices and changes must be received at least 6 months in advance of the meeting and should be addressed to:

**Calendar, American Journal of Psychiatry, 1000 Wilson Boulevard, Suite 1825, Arlington, VA 22209-3901, [swestate@psych.org](mailto:swestate@psych.org) (e-mail).**

Because of space limitations, only listings of meetings of the greatest interest to Journal readers may be included.

---

## NOVEMBER

**November 1–December 5**, Poster submissions open for May 2012 Annual Meeting of the American Psychiatric Association.

---

## DECEMBER

**December 4–8**, 50th Annual Meeting, American College of Neuropsychopharmacology, Waikaloa Beach, Hawaii. Contact: [acnp@acnp.org](mailto:acnp@acnp.org); (615) 324-2360.

---

## MARCH 2012

**March 21–24**, 23rd Annual Meeting, American Neuropsychiatric Association, New Orleans, La. Contact: (614) 447-2077 or visit [www.anpaonline.org](http://www.anpaonline.org) (web site).

---

## APRIL 2012

**April 22–25**, Annual Meeting of the North American Society for Psychosocial Obstetrics and Gynecology (NASPOG), Providence, R.I. Contact NASPOG National Office, 8213 Lakenheath Way, Potomac, MD 20854; (301) 983-6282 (tel); [info@naspog.org](mailto:info@naspog.org) (email); [www.naspog.org](http://www.naspog.org) (web site).

---

## MAY 2012

**May 3–5**, 56th Annual Meeting, American Academy of Psychoanalysis and Dynamic Psychiatry, Philadelphia, Pa. Contact: Executive Office, AAPDP, PO Box 30, Bloomfield, CT 06002; (888) 691-8281 (tel), (860) 286-0787 (fax), [info@aapdp.org](mailto:info@aapdp.org) (e-mail), [www.aapdp.org](http://www.aapdp.org) (web site).

**May 5–9**, 165th Annual Meeting, American Psychiatric Association, Philadelphia, Pa. Contact: APA Annual Meetings Dept., 1000 Wilson Blvd., Ste. 1825, Arlington, VA 22209; (703) 907-7815.

---

## JUNE 2012

**June 23–27**, Joint Organizational Meeting of the Organization of Teratology Information Specialists, the Teratology Society, and the Neurobehavioral Teratology Society, Baltimore, Md. Contact Ms. Dee Quinn, University of Arizona, Drachman Hall, PO Box 210202, 1295 N. Martin, Room B308, Tucson, AZ 85721-0202; (520) 626-3547 (tel); [www.otispregnancy.org](http://www.otispregnancy.org); [www.teratology.org](http://www.teratology.org); [www.nbts.org](http://www.nbts.org).

---

## OCTOBER 2012

**October 3–5**, International Biennial Congress of the Marcé Society (International Society for the Understanding, Prevention and Treatment of Mental Illness Related to Childbearing), in collaboration with the Société Marcé Francophone, Paris, France (conducted in English). Contact: Ms. Nicole Greer, 5034-A Thoroughbred Lane, Brentwood, TN 37027 USA; (615) 324-2362 (tel); [info@marcesociety.com](mailto:info@marcesociety.com) (email); [www.marcesociety.com](http://www.marcesociety.com) (web site).

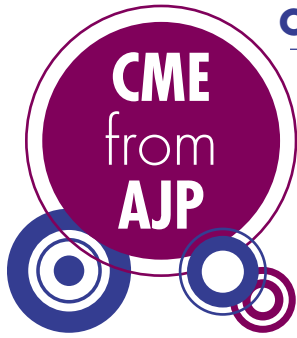

## Continuing Medical Education

Three articles in this issue form the basis of a short course with questions that can be answered for up to 1 *AMA PRA Category 1 Credit™* each by visiting <http://cme.psychiatryonline.org/> and clicking on “American Journal of Psychiatry CME.”

CME credit is issued only online, and a paid subscription to the AJP CME course program is required.

This month's courses appear on pages 1229–1232.

FREE AUDIO!

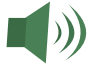

## Have You Heard?

You can listen to highlights of *The American Journal of Psychiatry* by downloading a monthly free .mp3 audio file from our web site (<http://ajp.psychiatryonline.org/misc/audio.dtl>) or by subscribing to the AJP Audio podcast at iTunes or other feed reader. Presented by Deputy Editor Dr. Susan Schultz or by Executive Editor Michael Roy, each month's audio lasts approximately 30 minutes and covers several research articles, the Treatment in Psychiatry feature, and one or two editorials.

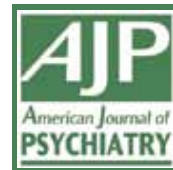

Coming in the December 2011 issue\*

## THE AMERICAN JOURNAL OF PSYCHIATRY

### The Study of Fear Extinction: Implications for Anxiety Disorders

B.M. Graham and M.R. Milad

### Childhood Trauma and Psychosis: A Case-Control and Case-Sibling Comparison Across Different Levels of Genetic Liability, Psychopathology, and Type of Trauma

M. Heins, C. Simons, T. Lataster, S. Pfeifer, D. Versmissen, M. Lardinois, M. Marcelis, P. Delespaul, L. Krabbendam, J. van Os, I. Myin-Germeys, and the GROUP project

### Increased Risk of Schizophrenia From Additive Interaction Between Infant Motor Developmental Delay and Obstetric Complications: Evidence From a Population-Based Longitudinal Study

M.C. Clarke, A. Tanskanen, M. Huttunen, D.A. Leon, R.M. Murray, P.B. Jones, and M. Cannon

### The Neural Circuits That Generate Tics in Tourette's Syndrome

Z. Wang, T.V. Maia, R. Marsh, T. Colibazzi, A. Gerber, and B.S. Peterson

\*Can't wait? Visit [ajp.psychiatryonline.org](http://ajp.psychiatryonline.org) and click the “AJP in Advance” logo to see all articles uploaded in advance of print!

# The Residents' JOURNAL

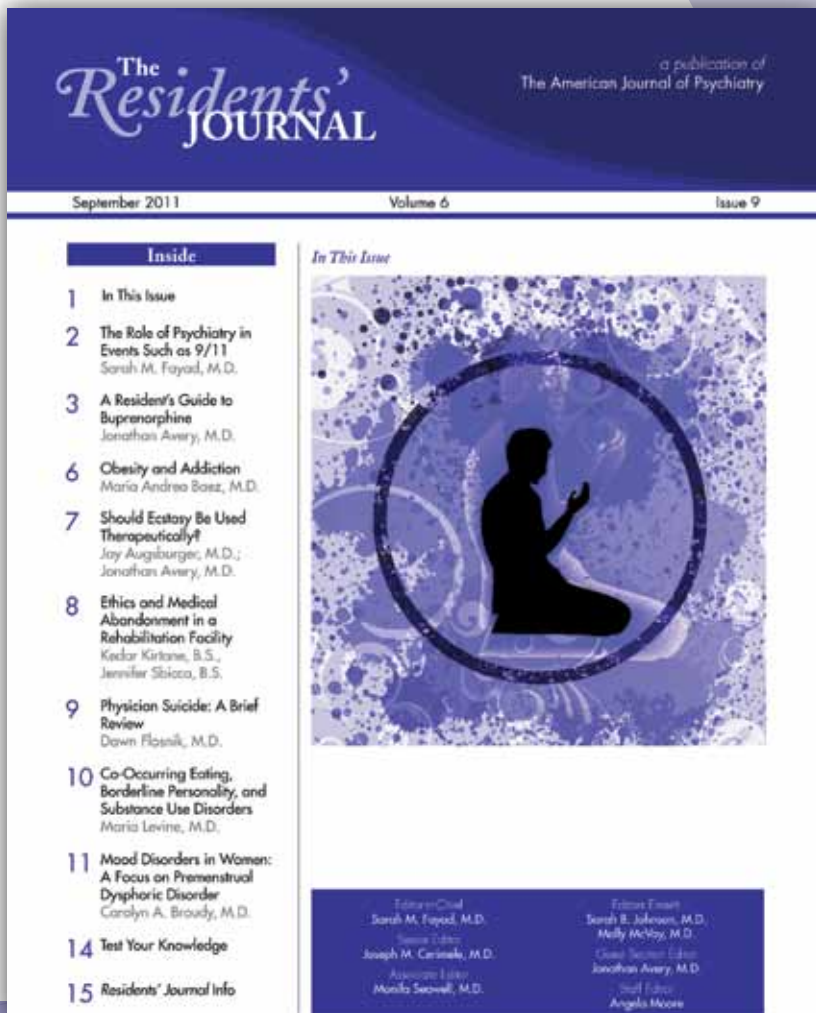

The Residents' Journal accepts manuscripts authored by medical students, resident physicians, and fellows. To submit your paper, please visit the manuscript submission site at [mc.manuscriptcentral.com/appi-ajp](http://mc.manuscriptcentral.com/appi-ajp) and either create an account or use your existing account. For manuscript type, select "Residents." Then follow the instructions to upload your manuscript. Residents who are interested in participating as Guest Section Editors should e-mail the Residents' Journal Editor-in-Chief Sarah M. Fayad at [fayad@ufl.edu](mailto:fayad@ufl.edu).

See the September 2010 issue for details on the new peer review process.

The Residents' Journal is sent free-of-charge to all psychiatry residents. Anyone interested in being included on the distribution list should contact Angela Moore, the Residents' Journal staff editor at [ajp@psych.org](mailto:ajp@psych.org) with "Subscribe to Residents' Journal" in the subject line.

**Upcoming Issue Themes**  
November: Autistic Disorders

To access the complete Residents' Journal archives, visit [ajp.psychiatryonline.org/misc/Residents\\_Journal.dtl](http://ajp.psychiatryonline.org/misc/Residents_Journal.dtl)

# New Fall Titles in Psychiatry!

## Textbook of Psychoanalysis, Second Edition

Edited by Glen O. Gabbard, M.D.,  
Bonnie E. Litowitz, Ph.D., and  
Paul Williams, Ph.D.

The only comprehensive textbook of psychoanalysis available in the United States, the *Textbook of Psychoanalysis* was written with both the beginning student in the mental health care professions and the practicing analyst in mind.

2012 • 672 pages • ISBN 978-1-58562-410-2 • Hardcover  
\$125.00 • Item #62410

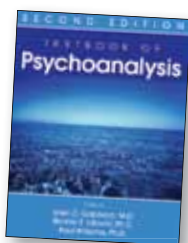

Coming  
November  
2011!

## Learning Supportive Psychotherapy An Illustrated Guide Core Competencies in Psychotherapy

Arnold Winston, M.D., Richard N. Rosenthal, M.D.,  
and Henry Pinsker, M.D.

Mastering the art of supportive psychotherapy demands years of training and experience—and *Learning Supportive Psychotherapy: An Illustrated Guide* paves the way. The text follows one of the three formats now required for psychiatry residency training by the Accreditation Council for Graduate Medical Education (ACGME).

2012 • 240 pages • ISBN 978-1-58562-399-0 • Paperback  
\$72.00 • Item #62399

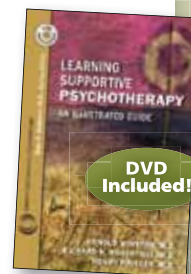

DVD  
Included!

NEW!

## Preventing Bullying and School Violence

Stuart W. Twemlow, M.D., and  
Frank C. Sacco, Ph.D.

A practical handbook for designing and sustaining effective interventions to address problem behaviors in schools, this book is designed to help clinicians, school counselors, and administrators create a safe climate for their students and to respond thoughtfully, but swiftly, when threats arise.

2012 • 337 pages • ISBN 978-1-58562-384-6 • Paperback  
\$55.00 • Item #62384

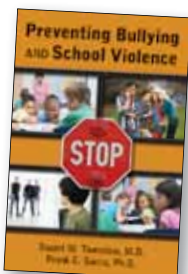

NEW!

## Professionalism in Psychiatry

Glen O. Gabbard, M.D., Laura Weiss Roberts, M.D.,  
M.A., Holly Crisp-Han, M.D., Valdesha Ball, M.D.,  
Gabrielle Hobday, M.D., and Funmilayo Rachal, M.D.

In *Professionalism in Psychiatry*, the authors seek to define the factors that influence professionalism and address principles that are now part of the core curriculum for medical students, psychiatry students, educators, and practicing clinicians. This book is a must read for any educator or professional wanting to better understand the relationship between professionalism, ethics, and the avoidance of boundary violations.

2012 • 240 pages • ISBN 978-1-58562-337-2 • Paperback  
\$60.00 • Item #62337

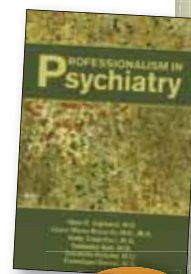

Coming  
October  
2011!

## Laboratory Medicine in Psychiatry and Behavioral Science

Sandra A. Jacobson, M.D.

*Laboratory Medicine in Psychiatry and Behavioral Science* is the only current book of its kind on the market, and the only laboratory reference to which psychiatrists and behavioral health clinicians can turn to find content that is directly related to their work.

2012 • 736 pages • ISBN 978-1-58562-383-9  
Paperback • \$75.00 • Item #62383

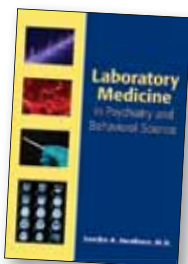

NEW!

## Clinical Manual of Psychosomatic Medicine A Guide to Consultation-Liaison Psychiatry, Second Edition

Kemuel L. Philbrick, M.D., James R. Rundell, M.D.,  
Pamela J. Netzel, M.D., and James L. Levenson, M.D.

The second edition of this book provides practicing psychiatrists and psychiatry residents, as well as internists and family medicine physicians, with the tools they need to navigate this difficult treatment terrain.

2012 • 544 pages • ISBN 978-1-58562-393-8 • Paperback  
\$68.00 • Item #62393

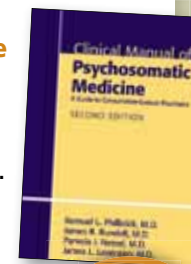

Coming  
October  
2011!

## Cognitive-Behavior Therapy for Children and Adolescents

Edited by Eva Szigethy, M.D., Ph.D.,  
John R. Weisz, Ph.D., ABPP, and  
Robert L. Findling, M.D.

2012 • 625 pages • ISBN 978-1-58562-406-5  
Paperback • \$75.00 • Item #62406

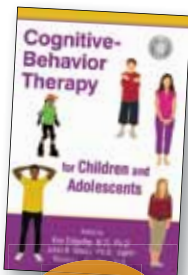

Coming  
December  
2011!

## Clinical Manual of Neuropsychiatry

Edited by Stuart C. Yudofsky, M.D., and  
Robert E. Hales, M.D., M.B.A.

*Clinical Manual of Neuropsychiatry* offers the comprehensive, expert guidance clinicians require to deliver cutting-edge, compassionate patient care. This book is an indispensable resource and a substantive contribution to the literature.

2012 • 416 pages • ISBN 978-1-58562-429-4  
Paperback • \$79.00 • Item #62429

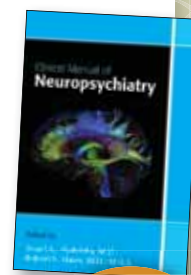

Coming  
November  
2011!

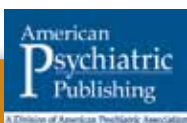

The *First and Last Word*  
in Psychiatry

[www.appi.org](http://www.appi.org)

Email: [appi@psych.org](mailto:appi@psych.org)

Phone: 1-800-368-5777

Find us on  
facebook  
and  
twitter

Priority Code: AH1141

## Contents

- A17 Editorial Board  
A19 Highlights of this issue

## Editorials

- 351 **Great wits and madness: more near allied?**  
K. R. Jamison

- 353 **Low serotonergic tone and elevated risk for substance misuse**  
D. Nutt

- 354 **The Last Vision of Angus McKay – poems by doctors**  
Tom Pow

- 355 **Overestimating patients' capacity**  
P. Lepping

- 357 **Improving end-of-life care for people with dementia**  
E. L. Sampson, A. Burns and M. Richards

- 359 **Batman and psychiatry – psychiatry in the movies**  
Joseph Kane

## Special article

- 360 **A centenarian *extraordinaire***  
P. Tyrer

## Review articles

- 361 **Predicting the development of schizophrenia in high-risk populations: systematic review of the predictive validity of prodromal criteria**  
J. Chuma and P. Mahadon

- 367 **Biogenetic explanations and public acceptance of mental illness: systematic review of population studies**  
M. C. Angermeyer, A. Holzinger, M. G. Carta and G. Schomerus

## Papers

- 373 **Creativity and mental disorder: family study of 300 000 people with severe mental disorder**  
S. Kyaga, P. Lichtenstein, M. Boman, C. Hultman, N. Långström and M. Landén

- 380 **Cannabis, COMT and psychotic experiences**  
S. Zammit, M. J. Owen, J. Evans, J. Heron and G. Lewis

- 386 **Impact of cannabis use on thalamic volume in people at familial high risk of schizophrenia**  
K. A. Welch, A. C. Stanfield, A. M. McIntosh, H. C. Whatley, D. E. Job, T. W. Moorhead, D. G. C. Owens, S. M. Lawrie and E. C. Johnstone

- 391 **Effects of lowered serotonin transmission on cocaine-induced striatal dopamine response: PET [<sup>11</sup>C]raclopride study in humans**  
S. M. L. Cox, C. Benkelfat, A. Dagher, J. S. Delaney, F. Durand, T. Kolivakis, K. F. Casey and M. Leyton

- 397 **Buried alive – extra**  
Cyrus Abbasian

- 398 **Clinical and cognitive characteristics of children with attention-deficit hyperactivity disorder, with and without copy number variants**  
K. Langley, J. Martin, S. S. Agha, C. Davies, E. Stergiakouli, P. Holmans, N. Williams, M. Owen, M. O'Donovan and A. Thapar

- 404 **Relationship of orthostatic blood pressure to white matter hyperintensities and subcortical volumes in late-life depression**  
S. J. Colloby, A. Vasudev, J. T. O'Brien, M. J. Firbank, S. W. Parry and A. J. Thomas

- 411 **Persistent distress after psychological exposure to the Nagasaki atomic bomb explosion**  
Y. Kim, A. Tsutsumi, T. Izutsu, N. Kawamura, T. Miyazaki and T. Kikkawa

- 417 **Dying well with dementia: qualitative examination of end-of-life care**  
V. Lawrence, K. Samsi, J. Murray, D. Harari and S. Banerjee

- 423 **Effectiveness of Australian youth suicide prevention initiatives**  
A. Page, R. Taylor, D. Gunnell, G. Carter, S. Morrell and G. Martin

- 429 **Psychiatric exceptionalism – in 100 words**  
Nicholas Kontos, Oliver Freudenreich, John Querques

## Short report

- 430 **Long-term sickness absence among patients with chronic fatigue syndrome**  
A. K. Knudsen, M. Henderson, S. B. Harvey and T. Chaidar

## Columns

- 432 **Correspondence**  
434 **Book reviews**  
436 **Contents of *Advances in Psychiatric Treatment***  
437 **Contents of the *American Journal of Psychiatry***  
438 **From the Editor's desk**

## Cover picture

*Petit DEXA-Dan* (2010).  
Danny McDonald (b. 1949)

Recent studies have demonstrated the involvement of psychological factors in the development of heart disease, with depressive illness and anxiety being linked to clinical cardiovascular events. Danny McDonald is an Australian artist who has been dealing with medical science as a subject for his work for over 20 years. Responding to his own family history of cardiac health, he established a residency in the Human Neurotransmitters Laboratory of Dr Gavin Lambert at The Baker IDI Heart & Diabetes Institute, Melbourne to explore the potential central nervous, physiological and genetic narrative. *Petit DEXA-Dan* derives from this intervention and functions as a portrait of the artist – a definition of self through data of various kinds – a 'research visage' highlighting the brain-heart nexus. Based on clinical tests this view from within provides new knowledge of his internal being, identity and materiality – a graphic image expressed in alternative vocabulary as to what he is rather than what he looks like.

We are always looking for interesting and visually appealing images for the cover of the *Journal* and would welcome suggestions or pictures, which should be sent to Dr Allan Beveridge, British Journal of Psychiatry, 17 Belgrave Square, London SW1X 8PG, UK or [bjp@rcpsych.ac.uk](mailto:bjp@rcpsych.ac.uk).

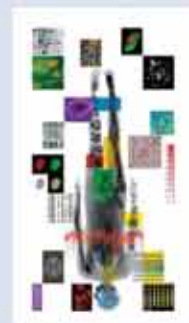

Source: http://ajp.psychiatryonline.org/doi/suppl/10.1176/ajp.2011.168.issue-11/suppl_file/front.pdf
