## Continuing Medical Education

You now have an opportunity to earn CME credits by reading articles in *The American Journal of Psychiatry*. Three articles in this issue each comprise a short course for up to 1 *AMA PRA Category 1 Credit*<sup>™</sup> each. The course consists of reading the article and answering three multiple-choice questions with a single correct answer. CME credit is issued only online. Readers who want credit must subscribe to the AJP Continuing Medical Education Course Program ([cme.psychiatryonline.org](http://cme.psychiatryonline.org)), select *The American Journal of Psychiatry* at that site, take the course(s) of their choosing, complete the evaluation form, and submit their answers for CME credit. A link from the question to the correct answer in context will be highlighted in the associated article. A certificate for each course will be generated upon successful completion. This activity is sponsored by the American Psychiatric Association.

### Information to Participants

**Objectives.** After evaluating a specific journal article, participants should be able to demonstrate an increase in their knowledge of clinical medicine. Participants should be able to understand the contents of a selected research or review article and to apply the new findings to their clinical practice.

**Participants.** This program is designed for all psychiatrists in clinical practice, residents in Graduate Medical Education programs, medical students interested in psychiatry, and other physicians who wish to advance their current knowledge of clinical medicine.

**Explanation of How Physicians Can Participate and Earn Credit.** In order to earn CME credit, subscribers should read through the material presented in the article. After reading the article, complete the CME quiz online at [cme.psychiatryonline.org](http://cme.psychiatryonline.org) and submit your evaluation and study hours (up to 1 *AMA PRA Category 1 Credit*<sup>™</sup>).

**Credits.** The American Psychiatric Association designates this educational activity for a maximum of 1 *AMA PRA Category 1 Credit*<sup>™</sup>. Physicians should only claim credit commensurate with the extent of their participation in the activity. The American Psychiatric Association is accredited by the Accreditation Council for Continuing Medical Education to provide continuing medical education for physicians.

### Information on Courses

**Title:** Gray Matter Volume Abnormalities in ADHD: Voxel-Based Meta-Analysis Exploring the Effects of Age and Stimulant Medication

**Faculty:** Tomohiro Nakao, M.D., Ph.D., Joaquim Radua, M.D., Katya Rubia, Ph.D., David Mataix-Cols, Ph.D.

**Affiliations:** From the Department of Neuropsychiatry, Graduate School of Medical Sciences, Kyushu University, Fukuoka, Japan (T.N.), and the Institute of Psychiatry, King's College London (J.R., K.R., D.M.-C.).

**Disclosures:** Dr. Rubia has received research funding and/or speakers honoraria from Eli Lilly, Medice, and Shire. The other authors report no financial relationships with commercial interests.

**Discussion of unapproved or investigational use of products\*:** No

**Title:** Budget Impact and Sustainability of Medical Care Management for Persons With Serious Mental Illnesses

**Faculty:** Benjamin G. Druss, M.D., M.P.H., Silke A. von Esenwein, Ph.D., Michael T. Compton, M.D., M.P.H., Liping Zhao, M.S.P.H., Douglas L. Leslie, Ph.D.

**Affiliations:** From the Rollins School of Public Health, Emory University, Atlanta (B.G.D., S.A.v.E., L.Z.); the George Washington University School of Medicine and Health Sciences, Washington, D.C. (M.T.C.); and the Department of Public Health Sciences, Pennsylvania State University, Hershey (D.L.L.).

**Disclosures:** The authors report no financial relationships with commercial interests.

**Discussion of unapproved or investigational use of products\*:** No

**Title:** The Pathology of Social Phobia Is Independent of Developmental Changes in Face Processing

**Faculty:** Karina S. Blair, Ph.D., Marilla Geraci, M.S.N., Katherine Korelitz, B.S., Marcela Otero, B.A., Ken Towbin, M.D., Monique Ernst, M.D., Ph.D., Ellen Leibenluft, M.D., R.J.R. Blair, Ph.D., Daniel S. Pine, M.D.

**Affiliations:** From the Mood and Anxiety Program, National Institute of Mental Health, Bethesda, Md.

**Disclosures:** The authors report no financial relationships with commercial interests.

**Discussion of unapproved or investigational use of products\*:** No

\* APA policy requires disclosure by CME authors of unapproved or investigational use of products discussed in CME programs. Off-label use of medications by individual physicians is permitted and common. Decisions about off-label use can be guided by scientific literature and clinical experience.

Exams are available online only at [cme.psychiatryonline.org](http://cme.psychiatryonline.org)

## INFORMATION TO PARTICIPANTS

**OBJECTIVES.** After evaluating a specific journal article, participants should be able to demonstrate an increase in their knowledge of clinical medicine. Participants should be able to understand the contents of a selected research or review article and to apply the new findings to their clinical practice.

**PARTICIPANTS.** This program is designed for all psychiatrists in clinical practice, residents in Graduate Medical Education programs, medical students interested in psychiatry, and other physicians who wish to advance their current knowledge of clinical medicine.

**EXPLANATION OF HOW PHYSICIANS CAN PARTICIPATE AND EARN CREDIT.** In order to earn CME credit, subscribers should read through the material presented in the article. After reading the ar-

ticle, complete the CME quiz online at [cme.psychiatryonline.org](http://cme.psychiatryonline.org) and submit your evaluation and study hours (up to 1 *AMA PRA Category 1 Credit*<sup>™</sup>).

**CREDITS.** The American Psychiatric Association designates this educational activity for a maximum of 1 *AMA PRA Category 1 Credit*<sup>™</sup>. Physicians should only claim credit commensurate with the extent of their participation in the activity.

The American Psychiatric Association is accredited by the Accreditation Council for Continuing Medical Education to provide continuing medical education for physicians.

**Estimated Time to Complete: 1 Hour**

Begin date November 1, 2011 – End date October 31, 2013

## EXAMINATION QUESTIONS

Select the single best answer for each question below.

### Gray Matter Volume Abnormalities in ADHD: Voxel-Based Meta-Analysis Exploring the Effects of Age and Stimulant Medication

Tomohiro Nakao et al.

Am J Psychiatry 2011; 168:1154–1163

**Learning Objective.** The participant will identify brain regions that may be involved in attention deficit hyperactivity disorder.

**Subject Node.** ADHD

1. Which brain region had smaller gray matter volume in ADHD patients relative to healthy comparison subjects?

- A. The frontal lobe
- B. The right lentiform nucleus
- C. The posterior cingulate
- D. The nucleus accumbens

2. Which brain region had larger gray matter volume in ADHD patients relative to comparison subjects?

- A. The frontal lobes
- B. The lenticular nucleus
- C. The posterior cingulate
- D. The basal ganglia

3. Which of the following factors were shown to influence the brain structure deficits in ADHD patients?

- A. Age
- B. Stimulant medication
- C. Both
- D. Neither

## EVALUATION QUESTIONS

This evaluation form is adapted from the *MedBiquitous Journal-Based Continuing Education Guidelines* 28 November 2005. This evaluation will appear online at the end of each CME course. Participants must complete this evaluation in order to receive credit. Select the response which best indicates your reaction to the following statements about this activity.

**STATEMENT 1.** The activity achieved its stated objectives.

- 1. Strongly agree
- 2. Agree
- 3. Neutral
- 4. Disagree
- 5. Strongly disagree

**STATEMENT 2.** The activity was relevant to my practice.

- 1. Strongly agree
- 2. Agree
- 3. Neutral
- 4. Disagree
- 5. Strongly disagree

**STATEMENT 3.** I plan to change my current practice based on what I learned in the activity.

- 1. Strongly agree
- 2. Agree
- 3. Neutral
- 4. Disagree
- 5. Strongly disagree

**STATEMENT 4.** The activity validated my current practice.

- 1. Strongly agree
- 2. Agree
- 3. Neutral
- 4. Disagree
- 5. Strongly disagree

**STATEMENT 5.** The activity provided sufficient scientific evidence to support the content presented.

- 1. Strongly agree
- 2. Agree
- 3. Neutral
- 4. Disagree
- 5. Strongly disagree

**STATEMENT 6.** The activity was free of commercial bias toward a particular product or company.

- 1. Strongly agree
- 2. Agree
- 3. Neutral
- 4. Disagree
- 5. Strongly disagree

Exams are available online only at [cme.psychiatryonline.org](http://cme.psychiatryonline.org)

## INFORMATION TO PARTICIPANTS

**OBJECTIVES.** After evaluating a specific journal article, participants should be able to demonstrate an increase in their knowledge of clinical medicine. Participants should be able to understand the contents of a selected research or review article and to apply the new findings to their clinical practice.

**PARTICIPANTS.** This program is designed for all psychiatrists in clinical practice, residents in Graduate Medical Education programs, medical students interested in psychiatry, and other physicians who wish to advance their current knowledge of clinical medicine.

**EXPLANATION OF HOW PHYSICIANS CAN PARTICIPATE AND EARN CREDIT.** In order to earn CME credit, subscribers should read through the material presented in the article. After reading the ar-

title, complete the CME quiz online at [cme.psychiatryonline.org](http://cme.psychiatryonline.org) and submit your evaluation and study hours (up to 1 *AMA PRA Category 1 Credit*<sup>™</sup>).

**CREDITS.** The American Psychiatric Association designates this educational activity for a maximum of 1 *AMA PRA Category 1 Credit*<sup>™</sup>. Physicians should only claim credit commensurate with the extent of their participation in the activity.

The American Psychiatric Association is accredited by the Accreditation Council for Continuing Medical Education to provide continuing medical education for physicians.

**Estimated Time to Complete: 1 Hour**

Begin date November 1, 2011 – End date October 31, 2013

## EXAMINATION QUESTIONS

Select the single best answer for each question below.

### Budget Impact and Sustainability of Medical Care Management for Persons With Serious Mental Illnesses

Benjamin G. Druss et al.

Am J Psychiatry 2011; 168:1171–1178

**Learning Objective.** The participant will recognize the different perspectives used in assessing the financial sustainability of community mental health services.

**Subject Node.** Managed Care

1. What perspectives do managers primarily take in assessing whether to support evidence-based programs?

- A. Societal costs of the program
- B. Budget impact of the program
- C. Both
- D. Neither

2. On what measure was a significantly greater improvement *not* seen in the intervention group relative to the usual care group over the 2-year follow-up period?

- A. Prevention Quality Index
- B. Cardiometabolic Quality Index
- C. Mental component summary of the Short-Form Health Survey
- D. Physical component summary of the Short-Form Health Survey

3. What are important features of medical care management intervention in community mental health settings?

- A. Patient education
- B. Coordination of medical services
- C. Both
- D. Neither

## EVALUATION QUESTIONS

This evaluation form is adapted from the *MedBiquitous Journal-Based Continuing Education Guidelines* 28 November 2005. This evaluation will appear online at the end of each CME course. Participants **must** complete this evaluation in order to receive credit. Select the response which best indicates your reaction to the following statements about this activity.

**STATEMENT 1.** The activity achieved its stated objectives.

- 1. Strongly agree
- 2. Agree
- 3. Neutral
- 4. Disagree
- 5. Strongly disagree

**STATEMENT 2.** The activity was relevant to my practice.

- 1. Strongly agree
- 2. Agree
- 3. Neutral
- 4. Disagree
- 5. Strongly disagree

**STATEMENT 3.** I plan to change my current practice based on what I learned in the activity.

- 1. Strongly agree
- 2. Agree
- 3. Neutral
- 4. Disagree
- 5. Strongly disagree

**STATEMENT 4.** The activity validated my current practice.

- 1. Strongly agree
- 2. Agree
- 3. Neutral
- 4. Disagree
- 5. Strongly disagree

**STATEMENT 5.** The activity provided sufficient scientific evidence to support the content presented.

- 1. Strongly agree
- 2. Agree
- 3. Neutral
- 4. Disagree
- 5. Strongly disagree

**STATEMENT 6.** The activity was free of commercial bias toward a particular product or company.

- 1. Strongly agree
- 2. Agree
- 3. Neutral
- 4. Disagree
- 5. Strongly disagree

Exams are available online only at [cme.psychiatryonline.org](http://cme.psychiatryonline.org)

## INFORMATION TO PARTICIPANTS

**OBJECTIVES.** After evaluating a specific journal article, participants should be able to demonstrate an increase in their knowledge of clinical medicine. Participants should be able to understand the contents of a selected research or review article and to apply the new findings to their clinical practice.

**PARTICIPANTS.** This program is designed for all psychiatrists in clinical practice, residents in Graduate Medical Education programs, medical students interested in psychiatry, and other physicians who wish to advance their current knowledge of clinical medicine.

**EXPLANATION OF HOW PHYSICIANS CAN PARTICIPATE AND EARN CREDIT.** In order to earn CME credit, subscribers should read through the material presented in the article. After reading the ar-

title, complete the CME quiz online at [cme.psychiatryonline.org](http://cme.psychiatryonline.org) and submit your evaluation and study hours (up to 1 *AMA PRA Category 1 Credit*<sup>™</sup>).

**CREDITS.** The American Psychiatric Association designates this educational activity for a maximum of 1 *AMA PRA Category 1 Credit*<sup>™</sup>. Physicians should only claim credit commensurate with the extent of their participation in the activity.

The American Psychiatric Association is accredited by the Accreditation Council for Continuing Medical Education to provide continuing medical education for physicians.

**Estimated Time to Complete: 1 Hour**

Begin date November 1, 2011 – End date October 31, 2013

## EXAMINATION QUESTIONS

Select the single best answer for each question below.

### The Pathology of Social Phobia Is Independent of Developmental Changes in Face Processing

Karina S. Blair et al. • Am J Psychiatry 2011; 168:1202–1209

**Learning Objective.** The participant will recognize brain regions involved in the processing of facial expression in adult and adolescent social phobia.

**Subject Node.** Phobic Disorders

- Which of the following characterizes the findings regarding BOLD responses to facial expressions in persons with social phobia?
  - Only adults with social phobia show heightened amygdala responses to fearful expressions.
  - Only children with social phobia show heightened amygdala responses to fearful expressions.
  - There are no significant differences in BOLD response to fearful expressions in adults and children with social phobia relative to age-matched comparison subjects.
  - Both children and adults with social phobia show heightened amygdala responses to fearful expressions.
- In which brain area did the BOLD response to angry and fearful expressions correlate positively with self-reported social anxiety in the adult patients?
  - Amygdala
  - Anterior cingulate cortex
  - Medial frontal gyrus
  - Inferior frontal gyrus
- Which brain area shows an exaggerated response to self-referential social threats in social phobia?
  - Insula
  - Amygdala
  - Anterior cingulate gyrus
  - Medial prefrontal cortex

## EVALUATION QUESTIONS

This evaluation form is adapted from the *MedBiquitous Journal-Based Continuing Education Guidelines 28 November 2005*. This evaluation will appear online at the end of each CME course. Participants must complete this evaluation in order to receive credit. Select the response which best indicates your reaction to the following statements about this activity.

**STATEMENT 1.** The activity achieved its stated objectives.

- Strongly agree
- Agree
- Neutral
- Disagree
- Strongly disagree

**STATEMENT 2.** The activity was relevant to my practice.

- Strongly agree
- Agree
- Neutral
- Disagree
- Strongly disagree

**STATEMENT 3.** I plan to change my current practice based on what I learned in the activity.

- Strongly agree
- Agree
- Neutral
- Disagree
- Strongly disagree

**STATEMENT 4.** The activity validated my current practice.

- Strongly agree
- Agree
- Neutral
- Disagree
- Strongly disagree

**STATEMENT 5.** The activity provided sufficient scientific evidence to support the content presented.

- Strongly agree
- Agree
- Neutral
- Disagree
- Strongly disagree

**STATEMENT 6.** The activity was free of commercial bias toward a particular product or company.

- Strongly agree
- Agree
- Neutral
- Disagree
- Strongly disagree
