# THE AMERICAN JOURNAL OF PSYCHIATRY

---

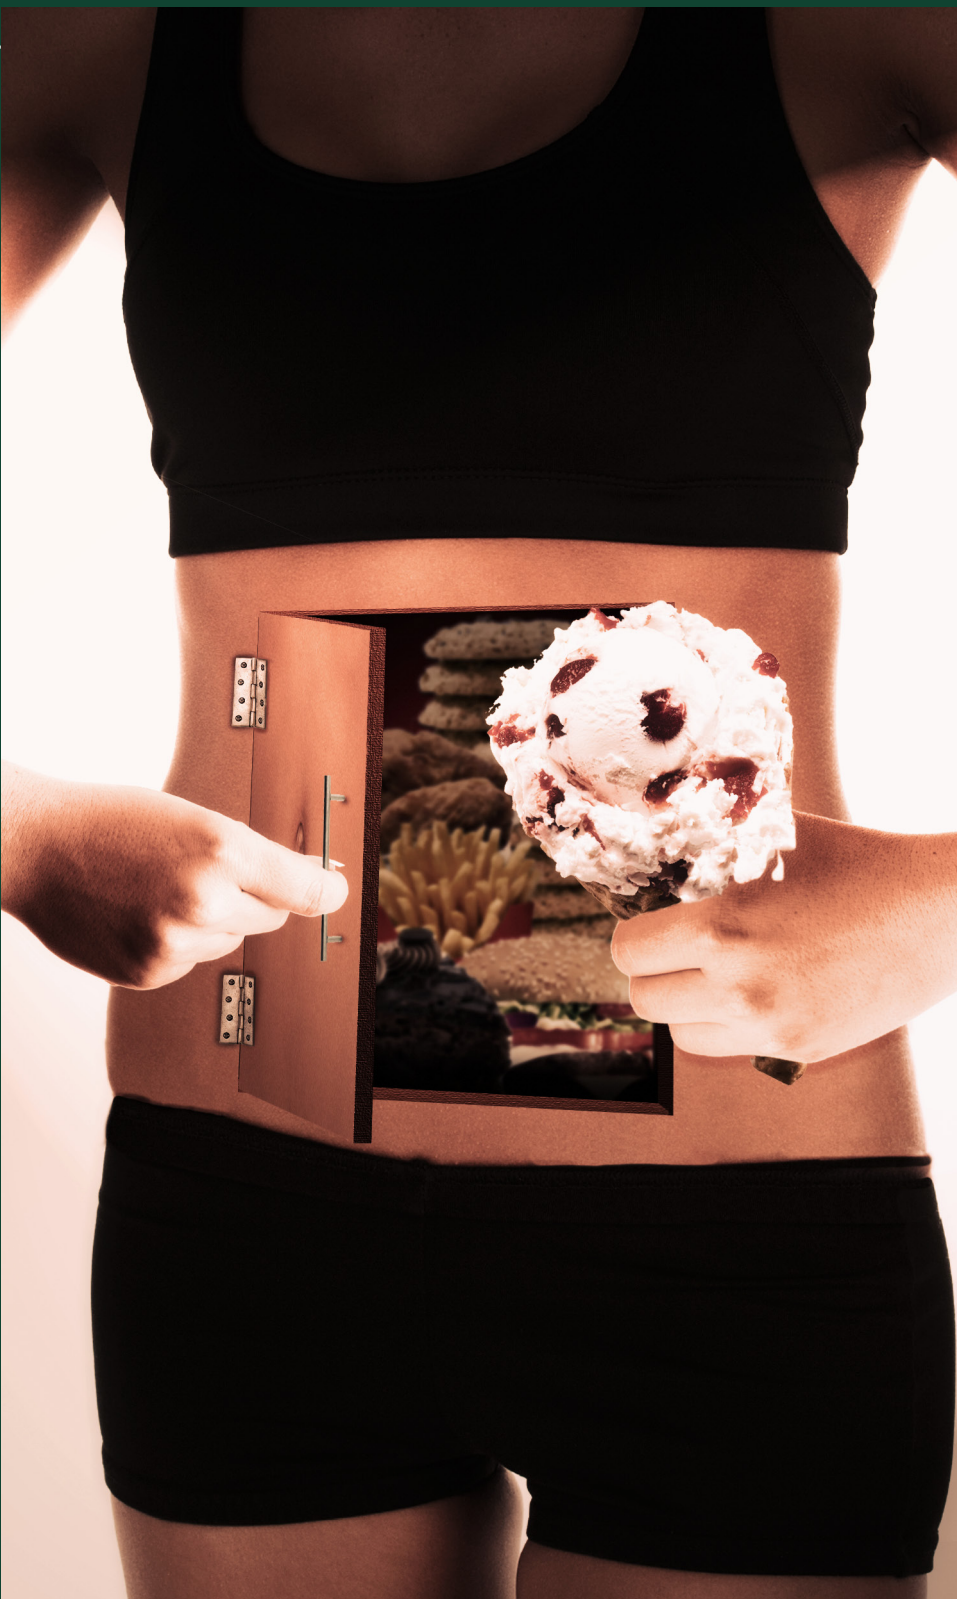

**Budget Impact and Sustainability  
of Medical Care Management  
for Persons With Serious Mental  
Illnesses**

Benjamin G. Druss, M.D., M.P.H., et al. 1171

**Episodes of Mood Disorders  
in 2,252 Pregnancies and  
Postpartum Periods**

Adele C. Viguera, M.D., M.P.H., et al. 1179

**Diagnostic Shifts During the  
Decade Following First Admission  
for Psychosis**

Evelyn J. Bromet, Ph.D., et al. 1186

◀ **An fMRI Study of Self-Regulatory  
Control and Conflict Resolution in  
Adolescents With Bulimia Nervosa**

Rachel Marsh, Ph.D., et al. 1210

**Continuing Medical Education** 1229

**November 2011**

**Volume 168 • Number 11**

---

Official Journal of the  
AMERICAN PSYCHIATRIC ASSOCIATION

---

[ajp.psychiatryonline.org](http://ajp.psychiatryonline.org)
